# Supplementary material
Source: MDPI journal article supplement (https://www.mdpi.com/2073-4395/13/11/2831)
Supplement: s1 [file s1]

**Table S1.** The genera observed in both samplings (3MAA and 6MAA) with their cp values and respective trophic group (3MAA: three months after application; 6MAA: six months after application).

| Genus                   | C-p class | Feeding type                             |
|-------------------------|-----------|------------------------------------------|
| <i>Axonchium</i>        | 5         | Herbivores - ectoparasites               |
| <i>Bitylenchus</i>      | 3         | Herbivores - ectoparasites               |
| <i>Helicotylenchus</i>  | 3         | Herbivores - semi-endoparasites          |
| <i>Heterodera</i>       | 3         | Herbivores - sedentary parasites         |
| <i>Longidorus</i>       | 5         | Herbivores - ectoparasites               |
| <i>Malenchus</i>        | 2         | Herbivores - epidermal/root hair feeders |
| <i>Paratylenchus</i>    | 2         | Herbivores - ectoparasites               |
| <i>Pratylenchus</i>     | 3         | Herbivores - migratory endoparasites     |
| <i>Trophurus</i>        | 3         | Herbivores - ectoparasites               |
| <i>Xiphinema</i>        | 5         | Herbivores - ectoparasites               |
| <i>Aphelenchoides</i>   | 2         | Fungivores                               |
| <i>Aphelenchus</i>      | 2         | Fungivores                               |
| <i>Ditylenchus</i>      | 2         | Fungivores                               |
| <i>Filenchus</i>        | 2         | Fungivores                               |
| <i>Acrobeles</i>        | 2         | Bacterivores                             |
| <i>Acrobeloides</i>     | 2         | Bacterivores                             |
| <i>Cervidellus</i>      | 2         | Bacterivores                             |
| <i>Chiloplacus</i>      | 2         | Bacterivores                             |
| <i>Cryptonchus</i>      | 4         | Bacterivores                             |
| <i>Diploscapter</i>     | 1         | Bacterivores                             |
| <i>Domorganus</i>       | 3         | Bacterivores                             |
| <i>Eucephalobus</i>     | 2         | Bacterivores                             |
| <i>Heterocephalobus</i> | 2         | Bacterivores                             |
| <i>Mesorhabditis</i>    | 1         | Bacterivores                             |
| <i>Panagrolaimus</i>    | 1         | Bacterivores                             |
| <i>Plectus</i>          | 2         | Bacterivores                             |
| <i>Rhabditis</i>        | 1         | Bacterivores                             |
| <i>Wilsonema</i>        | 2         | Bacterivores                             |
| <i>Clarkus</i>          | 4         | Predators                                |
| <i>Discolaimus</i>      | 4         | Omnivores                                |
| <i>Thonus</i>           | 4         | Omnivores                                |
| <i>Dorydorella</i>      | 4         | Omnivores                                |
| <i>Mesodorylaimus</i>   | 4         | Omnivores                                |
| <i>Microdorylaimus</i>  | 4         | Omnivores                                |
| <i>Prodorylaimus</i>    | 4         | Omnivores                                |
| <i>Thornia</i>          | 4         | Omnivores                                |

**Table S2.** Mean temperatures and total rainfall for each month throughout the experimental period.

|          | Mean Temperature<br>(°C) | Total rainfall<br>(mm) |
|----------|--------------------------|------------------------|
| November | 10.7                     | 28                     |
| December | 5.6                      | 37.8                   |
| January  | 3.7                      | 15.6                   |
| February | 6.5                      | 32                     |
| March    | 5.8                      | 29.4                   |
| April    | 12.6                     | 50.6                   |
| May      | 18.7                     | 21.8                   |

**Table S3.** Mean values ( $\pm$ SE) of the Dispersion Index (DI) were recorded 3 and 6 Months After the Application (MAA) of coffee waste (CW) at different rates. The results of Repeated measures ANOVA are denoted (ns:  $p > 0.05$ ) (Fisher's LSD post hoc test, for all cases  $n = 5$ ).

| Time   | Treatment | DI              |
|--------|-----------|-----------------|
| 3MAA   | Control   | 0.73 $\pm$ 0.04 |
|        | CW-2%     | 0.78 $\pm$ 0.04 |
|        | CW-4%     | 0.83 $\pm$ 0.01 |
|        | CW-8%     | 0.80 $\pm$ 0.04 |
| 6MAA   | Control   | 0.78 $\pm$ 0.01 |
|        | CW-2%     | 0.76 $\pm$ 0.04 |
|        | CW-4%     | 0.78 $\pm$ 0.01 |
|        | CW-8%     | 0.78 $\pm$ 0.03 |
| effect | Treatment | ns              |
|        | Time      | ns              |
|        | Tr*Time   | ns              |

**Table S4.** Total concentrations of N, P, K, OM, pH, EC in the soil samples (means  $\pm$ SE) of coffee waste (CW) at different rates, at 6 Months After Application. The results of one-way ANOVA are denoted (\*\*:  $p < 0.01$ ; \*\*\*:  $p < 0.001$ ; ns:  $p > 0.05$ ), while different letters within each column indicate statistically significant differences between treatments (Fisher's LSD post hoc test, for all cases  $n = 5$ ) (N: nitrogen; P: phosphorus; K: potassium; OM: organic matter; EC: electric conductivity).

| Treatment | N(%)            | P (ppm)           | K (ppm)             | OM (%)          | pH              | EC (mS/cm) |
|-----------|-----------------|-------------------|---------------------|-----------------|-----------------|------------|
| Control   | 2.4 $\pm$ 0.1c  | 400.6 $\pm$ 25.9b | 3132.9 $\pm$ 59.6c  | 1.0 $\pm$ 0.1b  | 6.8 $\pm$ 0.3b  | <0.5       |
| CW-2%     | 2.9 $\pm$ 0.2bc | 504.3 $\pm$ 13.5a | 3549.3 $\pm$ 56.6b  | 1.2 $\pm$ 0.2ab | 7.1 $\pm$ 0.0ab | <0.5       |
| CW-4%     | 3.1 $\pm$ 0.4ab | 498.1 $\pm$ 27.4a | 3570.9 $\pm$ 234.9b | 1.3 $\pm$ 0.1a  | 7.4 $\pm$ 0.1a  | <0.5       |
| CW-8%     | 3.5 $\pm$ 0.6a  | 503.6 $\pm$ 24.0a | 3914.8 $\pm$ 98.9a  | 1.4 $\pm$ 0.3a  | 7.3 $\pm$ 0.1a  | <0.5       |
| Effect    | **              | ***               | ***                 | **              | **              | ns         |

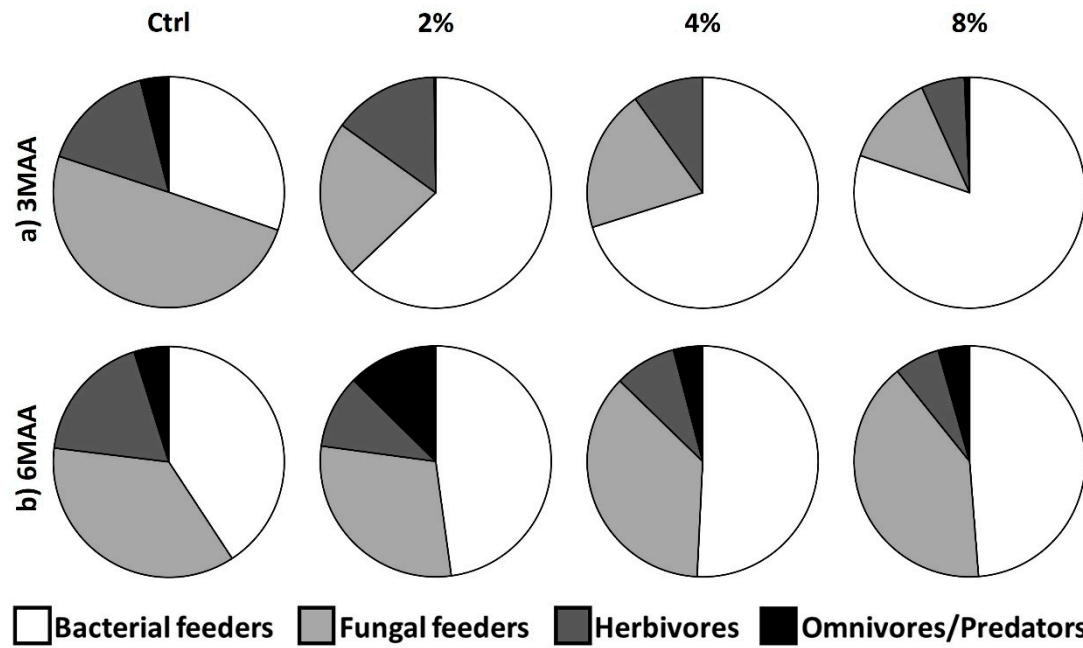

**Figure S1.** Pie charts illustrating the relative abundance of nematode trophic groups in coffee waste (CW) at different rates are presented for two time points: a) 3 months after application (3MAA) and b) 6 months after application (6MAA) (for all cases n=5).
